# Supplementary material
Source: publisher figshare collection journal article supplement (https://acs.figshare.com/ndownloader/files/5833992)
Supplement: Supplementary file 1 [file 5833992]

## A Short Stereoselective Synthesis of ( $\pm$ ) Epiasarinin

David J. Aldous<sup>b</sup>, Anne J. Dalençon<sup>a</sup>, Patrick G. Steel<sup>a\*</sup>

<sup>a</sup> Department of Chemistry, University of Durham, South Road, Durham, DH1 3TQ, UK

<sup>b</sup> Aventis Pharma Inc, Route 202-206, Bridgewater, P.O. box 6800, New Jersey 08807, USA.

[p.g.steel@durham.ac.uk](mailto:p.g.steel@durham.ac.uk)

### EXPERIMENTAL DATA

#### ***Methyl 4,5-epoxy-5-[3',4'-methylenedioxyphenyl]pent-2-enoate 13***

LDA (34mmol) {generated by the addition of nBuLi 1.6M (23.4 ml, 37.4 mmol) to a solution of diisopropylamine (4.75 ml, 34 mmol) in THF (40 ml) at  $-20^{\circ}\text{C}$  under  $\text{N}_2$ } was added dropwise to stirred solution of piperonal (10.2g, 68 mmol) and methyl 4-bromocrotonate (2 ml, 17 mmol) in THF (60 ml) under  $\text{N}_2$  at  $-20^{\circ}\text{C}$ . Typically, the transfer lasted 1hr for 20 mmol of crotonate. The reaction was stirred for 2h at  $-20^{\circ}\text{C}$  and then quenched with sat. aq.  $\text{NH}_4\text{Cl}$  (40ml). The layers were separated and the aqueous layer extracted with ether (3x20 ml). The combined organic layers were then washed with sat. aq.  $\text{NaHSO}_3$  (40g of  $\text{NaHSO}_3$  solid), sat. aq.  $\text{NaHCO}_3$  (20 ml) and brine (3x30 ml), dried ( $\text{MgSO}_4$ ) and concentrated. Purification by flash chromatography (ether : petrol (1:3)) afforded the title ester **13** as (43:57) mixture of *syn* and *anti* epoxides (2.95g, 70%).  $\nu_{\text{max}}$  2992 (epoxide), 2781 ( $\text{OCH}_2\text{O}$ ); 1719 ( $\alpha,\beta$  unsaturated  $\text{COOR}$ ); 1179 ( $\text{COOCH}_3$ );  $\delta_{\text{H}}$  (300MHz) 6.82-6.77 (3.43H; m; Ar-*H* + 3-*H* isomer B); 6.46 (0.57H; dd;  $J=15.6, 8.1$ ; 3-*H* A); 6.18 (0.57H; d;  $J=15.6$ ; 2-*H* A); 6.16 (0.43H; d;  $J=15.6$ ; 2-*H* B); 5.95 (2H; s;  $\text{OCH}_2\text{O}$ ); 4.25 (0.57H; d;  $J=4.2$ ; 5-*H* A); 3.76-3.67 (4H; m;  $\text{COOCH}_3$  + 4-*H* A + 5-*H* B); 3.41 (0.43H; dd;  $J= 6.9, 1.8$ ; 4-*H* B);  $\delta_{\text{C}}$  (100MHz) isomer A: 165.6 (*C-1*); 148.1, 147.7, 141.4, 127.6, 126.2, 119.9 (aromatics); 108.2 (*C-2*); 106.7 (*C-3*); 101.1 ( $\text{OCH}_2\text{O}$ ); 59.3 ( $\text{COOCH}_3$ ); 57.9 (*C-5*); 51.6 (*C-4*); Isomer B: 166.0 (*C-1*); 147.9, 147.5, 143.8, 129.8, 123.4, 119.9 (aromatics); 108.3 (*C-2*); 105.3 (*C-3*); 101.2 ( $\text{OCH}_2\text{O}$ ); 61.1 ( $\text{COOCH}_3$ ); 60.3 (*C-5*); 51.7(*C-4*);  $m/z$  (EI) 248 (12%) ( $\text{M}^+$ ); 135 (100%);  $m/z$  (CI,  $\text{NH}_3$ ) 266 (20%) ( $\text{MNH}_4^+$ ); 252 (80%); 233 (100%)

#### ***Cis 4-Methoxycarbonyl-5-[3',4'-methylenedioxyphenyl]-2,3-dihydrofuran 16c***

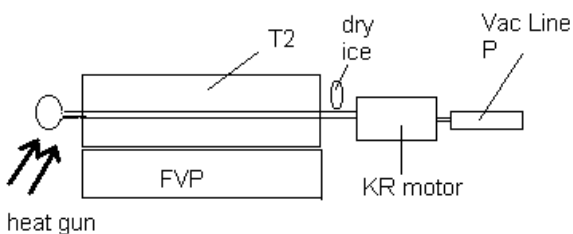

A sample of the vinyl epoxide **13** (~500mg) was placed in a 25ml rb flask and attached to the fvp apparatus as indicated in the schematic above. The apparatus was then evacuated to  $\leq 0.04$ mbar and the oven heated to 500°C. When the apparatus had stabilised at these conditions the sample was heated directly with a heat gun. The crude material collected in the cold trap was then purified by flash chromatography (ether : petrol (3:7)) to afford the desired pure *cis* dihydrofuran **16c** (66%) and a small amount of the *trans* isomer **16t** (~8%). For **16c**: Found: C 62.80, H 4.85.  $C_{13}H_{12}O_5$  requires C 62.90, H 4.87%.  $\nu_{\max}$  1733 (COOR); 1250  $cm^{-1}$ ;  $\delta_H$  (300 MHz): 6.82-6.76 (3H; m; aromatics); 6.68 (1H; t J=2.25; 2-*H*); 5.94 (2H; s; OCH<sub>2</sub>O); 5.67 (1H; d J=11.1; 5-*H*); 5.04 (1H; t J=2.25; 3-*H*); 4.06 (1H; dt J=2.25, 11.1; 4-*H*); 3.30 (3H; s; OCH<sub>3</sub>);  $\delta_C$  (125 MHz): 171.5 (COOMe); 148.8 (C-2); 147.4, 147.3, 131.0, 120.0, 107.8, 106.9 5 (aromatics); 101.0 (OCH<sub>2</sub>O); 99.3 (C-3); 84.3 (C-5); 53.4 (C-4); 51.6 (OCH<sub>3</sub>);  $R_t$  GC-MS=1130s;  $m/z$  (EI) 248 (28.6%) ( $M^+$ ); 159 (100%);  $m/z$  (CI, NH<sub>3</sub>) 266 (40%) ( $MNH_4^+$ ); 249 (100%) ( $MH^+$ ).

#### ***4-Hydroxymethyl-5-[3',4'-methylenedioxyphenyl]-2,3-dihydrofuran 17***

A solution of ester **16c** (400 mg, 1.61 mmol) in ether (10 ml) was introduced slowly to a suspension of LiAlH<sub>4</sub> (150 mg, 3.95 mmol, 2.45 eq) in ether (10 ml) at -40 °C under argon. The reaction mixture was stirred 3 h at -40 °C under argon and quenched with distilled water (150  $\mu$ l), NaOH 3N (150  $\mu$ l) and finally water (450  $\mu$ l) before being filtered through a celite bed and concentrated (347 mg, y=98%). The title alcohol was unstable and was used without further purification (storage at -20 °C under argon for a couple of hours only). *Cis* alcohol:  $\delta_H$  (300 MHz): 6.9-6.8 (3H; m; aromatics); 6.57 (1H; dd J=1.5, 2.7; 2-*H*); 5.97 (2H; s; OCH<sub>2</sub>O); 5.54 (1H; d J=9.45; 5-*H*); 4.99 (1H; t J=2.7; 3-*H*); 3.40-3.18 (3H; m; 4-*H*+CH<sub>2</sub>OH);  $\delta_C$  (62.5 MHz): 147.9 (C-2); 147.2, 147.0, 131.1, 119.6, 108.2, 106.9 (aromatics); 101.5(C-3); 101.1 (OCH<sub>2</sub>O); 84.6 (C-5); 62.6 (C-4), 48.7 (CH<sub>2</sub>OH).

#### ***3,7-dioxa-4-methoxy-2,6-bis[3',4'-methylenedioxyphenyl]bicyclo[3.3.0]octane 21a***

A solution of alcohol **17** (347 mg, 1.58 mmol) in DCM (10 ml) was slowly added in a solution of acetal **18a** (800 mg, 4.08 mmol, 2.6 eq) and TMSOTf (42.5  $\mu$ l, 2.38 mmol, 1.5 eq) in DCM (20 ml) at  $-40\text{ }^{\circ}\text{C}$  under argon. The resulting solution (dark purple) was stirred for 17 hours at  $-40\text{ }^{\circ}\text{C}$ , under argon, before being quenched with methanol (2 ml) and then sat. aq.  $\text{NaHCO}_3$  (15ml). The aqueous layer was extracted with ether (3x15 ml). The combined organic layers were washed with aq. sat.  $\text{NaHSO}_3$  (5x15 ml), to scavenge any piperonal, and with brine (3x15 ml), dried over  $\text{MgSO}_4$  and concentrated. The pure *endo* methyl furofuran **21a** (333.7 mg, 55%) was obtained after flash chromatography (petrol:ether (7:3)). Found  $\text{MNa}^+$ , 407.1139.  $\text{C}_{21}\text{H}_{20}\text{O}_7\text{Na}$  requires  $M$ , 407.1107).  $\nu_{\text{max}}$  2894, 1503, 1489, 1444, 1239, 1098, 1063, 1037  $\text{cm}^{-1}$ .  $\delta_{\text{H}}$  (300 MHz): 6.91-6.82 (6H, m, aromatics); 5.98 (2H, s,  $\text{OCH}_2\text{O}$ ); 5.97 (2H, s,  $\text{OCH}_2\text{O}$ ); 5.25 (1H, d  $J=6$ , 2-*H*); 4.82 (1H, d  $J=5.7$ , 6-*H*); 4.53 (1H, s, 4-*H*); 3.71 (1H, d  $J=8.4$ , 8-*H\_{endo}*); 3.50-3.44 (1H, m, 8-*H\_{exo}*); 3.17 (3H, s,  $\text{OCH}_3$ ), 3.15-3.09 (2H, m, 1-*H*, 5-*H*).  $\delta_{\text{C}}$  (125 MHz): 147.7, 147.6, 146.8, 146.7, 132.7, 132.4, 120.0, 119.5, 108.5, 108.4, 107.6, 107.1 (aromatics); 105.5 (*C*-4); 101.2 ( $\text{OCH}_2\text{O}$ ); 82.9 (*C*-6); 81.7 (*C*-2); 68.9 (*C*-8); 56.3 (*C*-3); 54.6 ( $\text{OCH}_3$ ); 48.3 (*C*-1).  $m/z$  (EI) 384 (32%) ( $\text{M}^+$ ); 203 (42%); 178 (99%); 84 (100%);  $m/z$  (CI,  $\text{CH}_4$ ) 385 ( $\text{MH}^+$ ); 353; 307; 135; 57 (100%)

### ***3,7-dioxa-2,6-bis[3',4'-methylenedioxyphenyl]bicyclo[3.3.0]octane(Epiasarinin) 1***

Triethylsilane (220  $\mu$ l, 2.6 mmol, 10 eq) was slowly added to a solution of acetal **21a** (100 mg, 0.26 mmol, 1 eq), in DCM (6 ml) at  $-40\text{ }^{\circ}\text{C}$  under argon.  $\text{BF}_3\cdot\text{OEt}_2$  (50  $\mu$ l, 0.275 mmol, 1.06 eq), was then added under the same conditions and the colour of the solution turned to dark red. The resulting solution was stirred for 15 hours at  $-40\text{ }^{\circ}\text{C}$  under argon before being poured into a saturated solution of sodium bicarbonate. The aqueous layer was extracted with ether (3x5 ml) and the combined organic layers were washed with brine (3x5 ml), dried ( $\text{MgSO}_4$ ) and concentrated. The residue was purified by flash chromatography (ether:petrol:triethylamine 1:3:0.1) to afford Epiasarinin (25mg, 27% ) and Asarinin (3mg, 3.3% ) and a mixture of the two diastereoisomers and starting material (37mg, 40%) which could be recycled. *Epiasarinin 1* mp =  $140\text{--}142\text{ }^{\circ}\text{C}$ ; Found: C 67.60, H 5.13.  $\text{C}_{20}\text{H}_{18}\text{O}_6$  requires C 67.79, H 5.12%  $\nu_{\text{max}}$  2922, 1460, 1376, 1253  $\text{cm}^{-1}$ ;  $\delta_{\text{H}}$  (500 MHz): 6.89 (2H, s, Ar-*H*); 6.82 (4H, s, Ar-*H*); 5.97 (4H, s,  $\text{OCH}_2\text{O}$ ); 4.87 (2H, d,  $J=5.04$ , 2-*H*, 6-*H*); 3.72 (2H, d  $J=9.7$ , 4-*H\_{endo}*, 8-*H\_{endo}*); 3.52 (2H, pseudo d  $J=9.45$ , 6.85, 4-*H\_{exo}*, 8-*H\_{exo}*); 3.13 (2H, m, 1-*H*, 5-*H*);  $\delta_{\text{C}}$  (125 MHz): 147.6, 146.7, 132.1, 119.5, 108.1, 107.1 (aromatics); 100.9 ( $\text{OCH}_2\text{O}$ ); 84.1 (*C*-2, *C*-6); 68.7 (*C*-4, *C*-8); 49.5 (*C*-1, *C*-5);  $m/z$  ( $\text{ES}^+$ ): 377.1 ( $\text{MNa}^+$ ); 731 ( $\text{M}_2\text{Na}^+$ ). *Asarinin 2*  $\nu_{\text{max}}$  2922, 1460, 1376, 1253;  $\delta_{\text{H}}$  (500 MHz): 6.86-6.78 (6H, m, Ar-*H*); 5.96 (2H, s,  $\text{OCH}_2\text{O}$ ); 5.95 (2H, s,  $\text{OCH}_2\text{O}$ ); 4.83 (1H, d  $J=5.15$ , 2-*H*); 4.39 (1H, d  $J=6.86$ , 6-*H*); 4.09 (1H, d,  $J=9.3\text{ Hz}$ , 4-

$H_{endo}$ ); 3.83-3.80 (2H, m, 4- $H_{exo}$ , 8- $H_{endo}$ ); 3.31-3.29 (2H, m, 1- $H$ , 8- $H_{exo}$ ); 2.88-2.83 (1H, m, 5- $H$ );  
 $\delta_C$  (125 MHz): 147.9, 147.6, 147.2, 146.5, 135.0, 132.2, 119.6, 118.7, 108.5, 106.5, 106.4  
(aromatics); 101.0, 100.9 (OCH<sub>2</sub>O); 87.6 (C-6); 82.0 (C-2); 70.9 (C-4); 69.7 (C-8); 54.6 (C-5); 50.1  
(C-1).
